# Supplementary material for: Dulaglutide improves muscle function by attenuating inflammation through OPA-1-TLR-9 signaling in aged mice
Source: Aging (Albany NY). 2021 Sep 19;13(18):21962–74. doi: 10.18632/aging.203546 (PMC8507261; doi:10.18632/aging.203546)
Supplement: Supplementary Figures [file aging-13-203546-s001.pdf]

SUPPLEMENTARY FIGURES

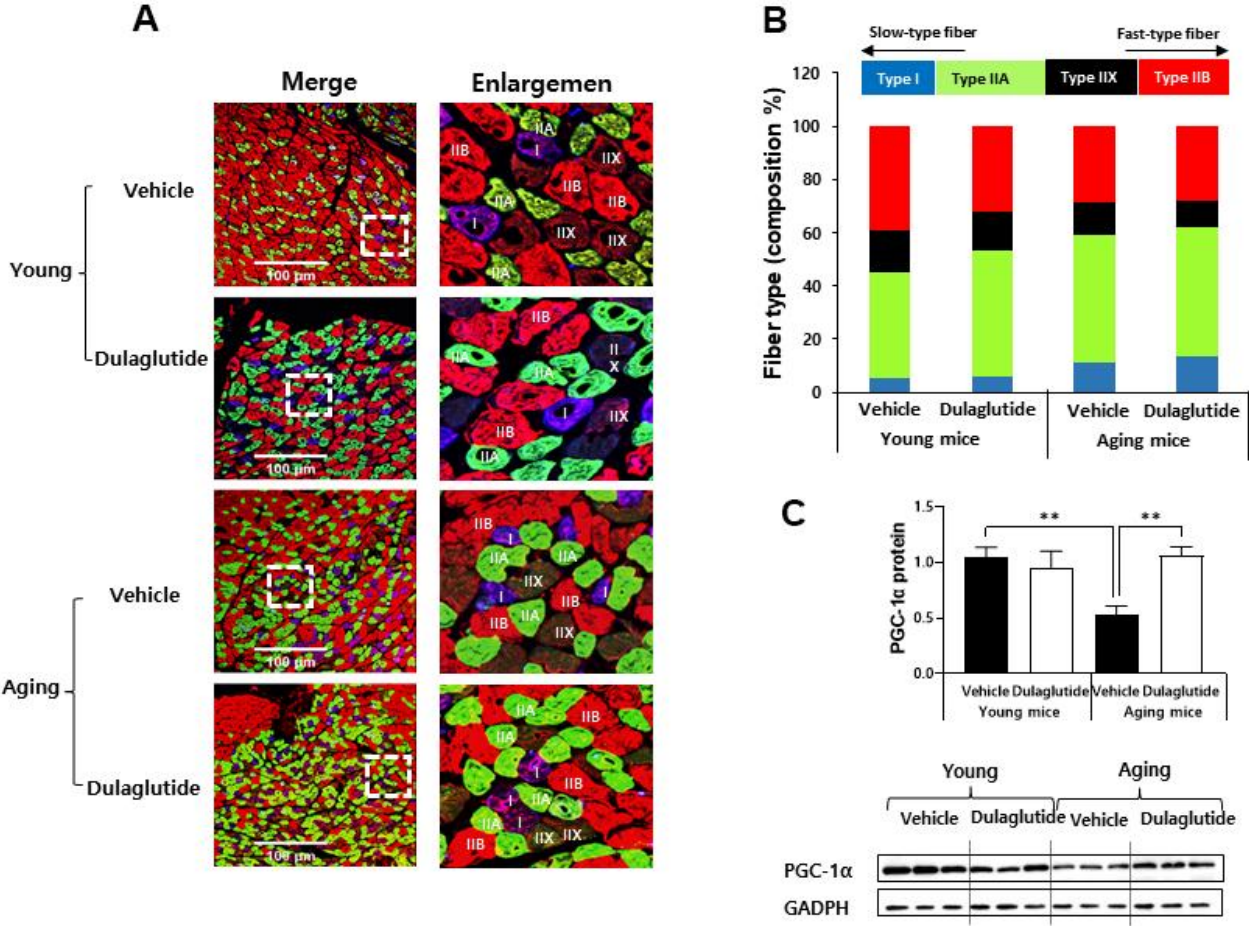

**Supplementary Figure 1. Changes in myosin heavy chain (MyHC) expression by dulaglutide treatment.** (A) Representative images of MyHC immunofluorescence in gastrocnemius muscle tissues for the triple-labeling with MyHC-I (blue, Type I fibers), MyHC-IIA (green, Type IIA fibers), and MyHC-IIB (red, type IIB fibers). (B) Proportion of MyHC isoforms-specific fibers. (C) Protein levels of PGC-1α in the TA muscle. The data are presented as the mean  $\pm$  SE. \* $p$  < 0.05, \*\* $p$  < 0.01. N = 4 /group.

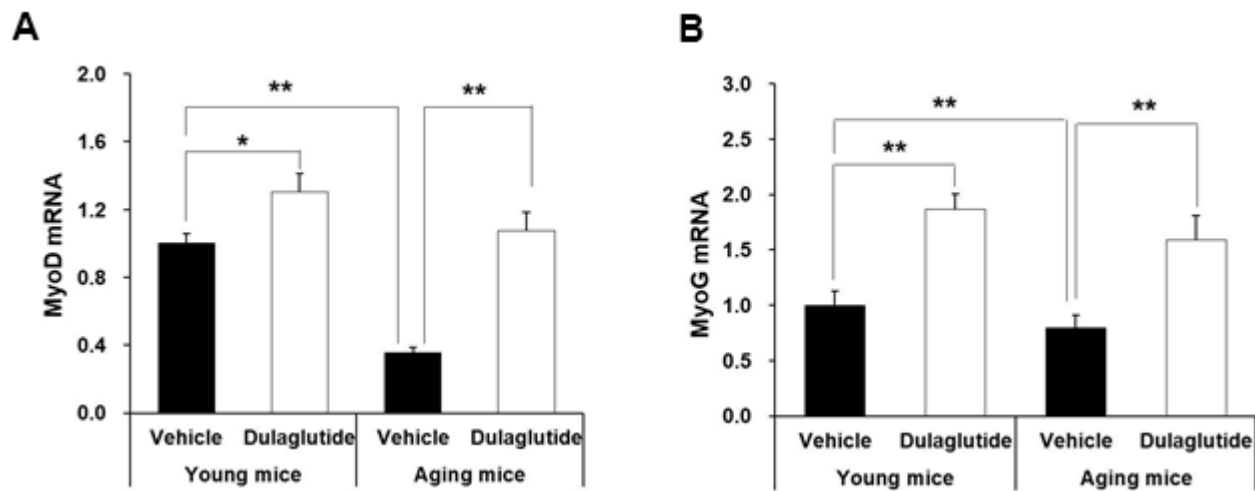

**Supplementary Figure 2. Dulaglutide treatment increases myogenic factors in both young and aged mice.** (A) mRNA expression of MyoD in the TA muscle (B) mRNA expression of MyoG in the TA muscle. All values are expressed as the mean  $\pm$  SE. Significant differences are indicated as \*\* $p$  < 0.01, or \* $p$  < 0.05 compared to young mice + vehicle or aged mice + vehicle. N = 5–8/group.
